FP105

**HISTOLOGICAL FINDINGS IN ACUTE INTERSTITIAL NEPHRITIS – A ROLE FOR SCORING NON-FIBROTIC INFLAMMATION**

Emma Cannon<sup>1</sup>, Alastair Rankin<sup>1</sup>, Keith Gillis<sup>1</sup>, Jana Crosby<sup>1</sup>, Patrick Mark<sup>1</sup>, Colin Geddes<sup>1</sup>, Jonathan Fox<sup>1</sup>, Bruce Mackinnon<sup>1</sup>, Emily Mcquarrie<sup>1</sup>, David Kipgen<sup>1</sup>

<sup>1</sup>Queen Elizabeth University Hospital, Glasgow, United Kingdom

**INTRODUCTION:** Acute interstitial nephritis (AIN) is a histological diagnosis. However, the clinical significance of common histological findings is uncertain.

The aim of this study was to categorise the main histological findings in a cohort of patients with AIN and evaluate the utility of histology in predicting clinical outcomes.

**METHODS:** Adult renal biopsies yielding a diagnosis of AIN between 2000 and 2015 in our centre were re-examined and scored for inflammation, tubular atrophy and characteristics of inflammatory cell infiltrates. Patients were divided into tertiles based on: 1) i-score: the percentage of non-scarred cortex containing inflammation (i1=0-24%, i2=25-74%, i3=75-100%), and 2) ct score: percentage of cortex containing tubular atrophy (ct1=0-9%; ct2=10-24%, ct3=25-100%). Baseline characteristics and clinical outcomes were collected. The primary outcome was a composite of <sup>3</sup>50% reduction in serum creatinine (sCr) or an eGFR >60 ml/min/1.73m<sup>2</sup> 1 year post biopsy.

**RESULTS:** From a total of 2817 biopsies, 147 (5%) were identified as diagnostic for AIN. 27 patients were excluded (pathology slides faded (n=7), insufficient clinical information (n=4), dual pathology (n=4) and died within 1 year of biopsy (n=12)). Of the remaining 120 patients, 73 (61%) were male, 75 (63%) had an identified drug cause and 97 (81%) received steroids. A total of 63 (53%) patients achieved the primary outcome.

On univariable logistic regression, i-3 was associated with a 16 times increased likelihood of achieving the primary outcome compared to i-1 (HR 16 (95% CI 5.2-50,  $p<0.001$ )). In contrast, ct-2 and ct-3 were associated with 70% and 90% reduced likelihood of achieving the primary outcome compared to ct-1 (HR 0.3 (95% CI 0.1-

0.8),  $p=0.01$  for ct-2; HR=0.10 (95%CI 0.0-0.3)  $p<0.001$  for ct-3). There was no difference in primary outcome between patients who did and did not have an identified drug cause, nor was there a difference between patients with and without eosinophils, neutrophils or granulomas on biopsy.

When age, sex, baseline sCr and identified drug cause were accounted for, both i-score and ct-score had an independent predictive effect on the primary outcome on multivariable logistic regression. Patients with high ct-score and low i-score were least likely to achieve the primary outcome.

Of the 97 patients who received steroids, 56 (58%) achieved the primary outcome compared to 10 (43%) of the 23 patients who did not receive steroids. As ct-score increased, the proportion of patients receiving steroids who achieved the primary outcome reduced from 80% in ct=1, 58% in ct=2, and 39% in ct=3, while it increased with i-score from 28% in i=1, 50% in i=2 and 86% in i=3.

**CONCLUSIONS:** In patients with biopsy-proven AIN, of whom the majority received steroids, a lower percentage of cortical tubular atrophy and, paradoxically, a higher percentage of inflammation in non-fibrosed cortex was associated with an increased likelihood of a positive clinical outcome. Larger studies to assess the effect of steroid therapy with regard to histological phenotype in AIN are warranted.
